# Supplementary material for: Release of transcriptional repression through the HCR promoter region confers uniform expression of HWP1 on surfaces of Candida albicans germ tubes
Source: PLoS One. 2018 Feb 13;13(2):e0192260. doi: 10.1371/journal.pone.0192260 (PMC5810986; doi:10.1371/journal.pone.0192260)
Supplement: S2 Appendix — (XLSX) [file pone.0192260.s005.xlsx]

## Sheet: Efg1
Note - I found the data by clicking on Samin's graphs in the PPT presentation entitled HCRGFPyeastphotos in Preliminary data.
efg1/efg1 mutant yeast conditions, NAT1 plasmids											efg1/efg1mutant hyphal conditions, NAT1 plasmids
						average		p									P
HCR	WT	246-3	6223.82		331.235	6119.63	147.352	0.00336526			HCR	WT	246-3	19041.6	862.514	20220.6	0.0160969	1667.28
HCR	WT	246-5	6015.44		336.791						HCR	WT	246-5	21399.5	549.451
HCR	efg1/efg1	504-4	8912.04		170.805	10419.7	1077.6				HCR	efg1/efg1	504-4	6279.4	226.074	9705.7	1502.74
HCR	efg1/efg2	504-5	11367.9		333.088						HCR	efg1/efg2	504-5	9816.82	263.033
HCR	efg1/efg3	504-8	10421.1		375.658						HCR	efg1/efg3	504-8	7898.41	92.7744
HCR	efg1/efg4	504-10	10977.9		241.889						HCR	efg1/efg4	504-10	8817.2	226.559
HCRd	WT	245-8	16427.4	240.632	16427.4						HCRd	WT	245-7	20115.7	923.579	15652.5	6311.9	0.97037	HCRd WT H
HCRd	WT	245-5			19545.5						HCRd	WT	245-8	11189.4	326.583
HCRd	WT	245-6			15909.5
					17294.2	1966.88
HCRd	efg1/efg1	503-28	16570.1		623.36	17510.6	942.005	0.872635			HCRd	efg1/efg1	503-28	13599	233.019	15861.7	1962.11
HCRd	efg1/efg2	503-29	17676.3		483.883						HCRd	efg1/efg2	503-29	18356.8	1135.01
HCRd	efg1/efg3	503-30	18749.5		574.233						HCRd	efg1/efg3	503-30	16043.2	886.736
HCRd	efg1/efg4	503-31	17046.5		648.433						HCRd	efg1/efg4	503-31	15447.7	332.979
	HCR-WT Y	6119.63	147.352								HCR-WT H	20220.6	862.514			p<0.01	ns	P<0.02	ns
	HCR-efg1 Y	10419.7	1077.6								HCR-efg1 H	8202.96	226.074
	HCR-WT H	20220.6
	HCR-efg1 H	8202.96	226.074
	HCRd-WT Y	16427.4									HCRd-WT H	15652.5	6311.9
	HCRd-efg1 Y	17510.6	942.005								HCRd-efg1 H	15861.7	1962.11
	HCRd-WT H	15652.5	6311.9
	HCRd-efg1 H	15861.7	1962.11
DATA for GRAPH
		HCR Y	HCRd Y		HCR H	HCRd H
	WT	6119.63	17294.2		20220.6	15652.5		SKD246	SKD245
	efg1/efg	10419.7	17510.6		9705.7	15861.7		SKD504	SKD503
	STD's
		147.352	1966.88		1667.28	6311.9
		1077.6	942.005		1502.74	1962.11

## Sheet: Nrg1
Nrg1
nrg1/nrg1 mutant yeast conditions, NAT1 plasmid										nrg1/nrg1 mutant hyphal conditions, NAT1 plasmids
HCR	WT	246-3	6223.82		331.235	6119.63	147.352	0.00214902		HCR	WT	246-3	19041.6	862.514	20220.6	0.819442	1667.28
HCR	WT	246-5	6015.44		336.791					HCR	WT	246-5	21399.5	549.451
HCR	nrg1/nrg1	502-2	16684.1	1258.65		17998.4	2424.99			HCR	nrg1/nrg1	502-2	17866.2	1081.03	20616.3	123.674
HCR	nrg1/nrg2	502-3	15664.9	609.408						HCR	nrg1/nrg2	502-3	22509.1	999.554
HCR	nrg1/nrg3	502-12	18441.2	1138.49						HCR	nrg1/nrg3	502-12	21880	800.569
HCR	nrg1/nrg4	502-14	21203.6	2456.37						HCR	nrg1/nrg4	502-14	20210	1035.71
HCRd	WT	245-8	16427.4	240.632	13422.7	297.752	1.22385	16427.4		HCRd	WT	245-7	20115.7	923.579	15652.5	6311.9	0.320848			SKD245-5	33117.3	13198.3	5540.22	11015.9	2274.09
HCRd	WT	245-5			15970.5	370.216		19545.5		HCRd	WT	245-8	11189.4	326.583	0.398533					SKD245-6	21729.9	8660.08	766.341
HCRd	WT	245-6			12999.5	246.519		15909.5		SKD245-8	WT EfgON-ps	245-8	28076.4	2368.76						SKD245-8	28076.4	11189.4	2368.76
								17294.2	1966.88
									0.0023687
HCRd	nrg1/nrg1	501-1	28400.8	2390.99		28003.7	1840.58			HCRd	nrg1/nrg1	501-1	21399.5	549.451	23328.6	2073.03
HCRd	nrg1/nrg2	501-2	29613.4	1739.3						HCRd	nrg1/nrg2	501-2	23065.6	743.433
HCRd	nrg1/nrg3	501-11	25997	2115.08						HCRd	nrg1/nrg3	501-11	25520.5	757.32
DATA for GRAPH								Yeast data is mostly from Dec-28-08 with corrected values for 245 from EfgON-ps due to problem with 245-7.
		HCR Y	HCRd Y		HCR H	HCRd H
	WT	6119.63	17294.2		20220.6	15652.5		SKD246	SKD245
	nrg1	17998.4	28003.7		20616.3	23328.6		SKD502	SKD501
	STD's
	WT	147.352	1966.88		1667.28	6311.9
	nrg1	2424.99	1840.58		123.674	2073.03
