# Supplementary material for: Release of transcriptional repression through the HCR promoter region confers uniform expression of HWP1 on surfaces of Candida albicans germ tubes
Source: PLoS One. 2018 Feb 13;13(2):e0192260. doi: 10.1371/journal.pone.0192260 (PMC5810986; doi:10.1371/journal.pone.0192260)
Supplement: S3 Appendix — (XLSX) [file pone.0192260.s006.xlsx]

## Sheet: List ; Plates 1 - 1
Well	Absorbance @ 600 (1.0s) - MDM (A)	Fluorescein (1.0s) - MDM (Counts)	R1	Absorbance @ 600 (1.0s) - MDM (A)	Fluorescein (1.0s) - MDM (Counts)	R2	Absorbance @ 600 (1.0s) - MDM (A)	Fluorescein (1.0s) - MDM (Counts)	R3	Absorbance @ 600 (1.0s) - MDM (A)	Fluorescein (1.0s) - MDM (Counts)	R4
A01	1.03173	1738	1684.55	1.09453	2134	1949.69	1.14411	2496	2181.61	1.17084	2819	2407.66
A02	1.02693	1722	1676.83	1.12671	2134	1894.01	1.17778	2490	2114.15	1.20078	2874	2393.44
A03	1.02919	1695	1646.92	1.11507	2078	1863.55	1.15261	2462	2136.02	1.17172	2827	2412.69		1902	SKD231	SKD232	SKD233	TerN1	TerN2	TerN8	TerC3	TerC9	TerC10
A04	1.02057	1798	1761.75	1.10521	2132	1929.05	1.14735	2408	2098.75	1.16803	2756	2359.53		2055.88	5857.24	21420.7	5622.67	11066.3	10597.7	8405.49	6396.31	4547.03	5191.89
A05	1.06143	4923	4638.09	1.12631	6340	5628.99	1.16309	7106	6109.61	1.18331	8345	7052.27		2019.61	6034.26	22213	6052.05	11126	10729.7	8555.89	6622.15	4571.8	5257.7
A06	1.05148	5070	4821.79	1.13707	6509	5724.34	1.18666	7729	6513.26	1.2086	8554	7077.63		2014.8	5948.21	22564.9	5732.28	11170.2	10578.8	8558.62	6295.69	4642.01	5230.29
A07	1.04771	4889	4666.38	1.12429	6334	5633.77	1.17171	7409	6323.24	1.19117	8540	7169.44		2037.27	5908.56	22324.1	5700.08	10718	10732.9	8636.26	6130.84	4700.27	5053.18
A08	1.0478	4917	4692.7	1.12486	6374	5666.46	1.16952	7366	6298.3	1.19181	8315	6976.79
A09	1.18584	20495	17283.1	1.23902	24649	19893.9	1.26439	28764	22749.4	1.28178	33014	25756.4		1902	SKD231	SKD232	SKD233	TerN1	TerN2	TerN8	TerC3	TerC9	TerC10			1902	HCR	HCRd	HCRc	TerY1	TerY2	TerYC3	TerYC10
A10	1.18267	20763	17556.1	1.23972	25905	20895.9	1.2673	29979	23655.8	1.28625	34400	26744.4		2031.89	5937.07	22130.7	5776.77	11020.1	10659.8	8539.06	6361.25	4615.28	5183.27			2031.89	5937.07	22130.7	5776.77	11020.1	10659.8	6361.25	5183.27
A11	1.1668	21163	18137.6	1.2304	26462	21506.9	1.26417	30056	23775.2	1.27639	34258	26839.8
A12	1.16898	21069	18023.4	1.23862	26204	21155.9	1.27218	30259	23785.1	1.28562	33853	26332		1902	SKD231	SKD232	SKD233	TerN1	TerN2	TerN8	TerC3	TerC9	TerC10			1902	SKD231	SKD232	SKD233	TerN1	TerN2	TerC3	TerC10
B01	1.09446	4819	4403.1	1.16037	6281	5412.95	1.19442	7110	5952.67	1.21304	8154	6721.97		18.6858	74.7317	495.586	189.197	205.854	82.944	96.5293	205.492	69.4932	90.8287			18.6858	74.7317	495.586	189.197	205.854	82.944	205.492	90.8287
B02	1.08019	4991	4620.49	1.15846	6646	5736.95	1.18518	7703	6499.42	1.19733	8802	7351.34
B03	1.07754	4930	4575.26	1.15987	6301	5432.5	1.19734	7245	6050.91	1.21681	8360	6870.44
B04	1.06599	4902	4598.52	1.15106	6206	5391.57	1.1921	7282	6108.56	1.21089	8115	6701.66
B05	1.0847	9268	8544.28	1.16095	12258	10558.6	1.19803	14206	11857.8	1.21562	16173	13304.4
B06	1.07166	9535	8897.4	1.15148	12361	10734.9	1.19119	13981	11737	1.21092	15905	13134.6
B07	1.06985	9637	9007.82	1.14397	12078	10558	1.18575	13965	11777.4	1.20575	16082	13337.7
B08	1.08892	9540	8761	1.15721	11653	10069.9	1.19715	13418	11208.3	1.21446	15585	12832.9
B09	1.16059	9945	8568.91	1.21448	12192	10038.9	1.24582	13787	11066.6	1.26213	16050	12716.6
B10	1.16338	10017	8610.23	1.21672	12285	10096.8	1.24763	14074	11280.6	1.26555	16365	12931.1
B11	1.16498	9990	8575.27	1.22027	12032	9860.15	1.25284	14083	11240.8	1.2705	16058	12639.1
B12	1.16138	9997	8607.89	1.22109	12386	10143.4	1.25034	14113	11287.4	1.26835	16353	12893.1
C01	0.96318	6638	6891.75	1.0239	8157	7966.62	1.07551	9626	8950.21	1.0983	10778	9813.39
C02	0.958534	6617	6903.25	1.03271	8272	8010.02	1.08352	9788	9033.55	1.10891	11396	10276.7
C03	0.96063	6633	6904.85	1.03563	8416	8126.44	1.08528	9797	9027.19	1.11193	11315	10176
C04	0.942965	6634	7035.25	1.01976	8227	8067.55	1.06846	9784	9157.09	1.09673	11280	10285.2
C05	1.21005	6065	5012.18	1.26196	7559	5989.89	1.27818	8660	6775.25	1.28652	10045	7807.91
C06	1.18997	6257	5258.1	1.24972	7772	6218.97	1.27385	8946	7022.81	1.28531	10268	7988.71
C07	1.20745	6016	4982.42	1.26098	7378	5851.01	1.27714	8489	6646.9	1.28414	9891	7702.42
C08	1.21175	5724	4723.75	1.26328	7267	5752.5	1.28161	8323	6494.16	1.28797	9728	7552.96
C09	0.839984	3223	3836.98	0.889477	3992	4488.03	0.957165	4487	4687.8	0.985065	5098	5175.29
C10	0.841804	3319	3942.73	0.888325	3959	4456.7	0.950265	4527	4763.93	0.981494	5029	5123.82
C11	0.836112	3244	3879.86	0.88804	4025	4532.45	0.966677	4604	4762.71	1.00074	5397	5393.03
C12	0.843151	3303	3917.45	0.911891	4112	4509.31	0.967666	4721	4878.75	1.01027	5552	5495.58
D01	0.971892	4195	4316.32	1.04227	5113	4905.66	1.09046	5855	5369.3	1.11701	6899	6176.29
D02	0.968302	4191	4328.2	1.0421	5186	4976.49	1.09323	5982	5471.84	1.12035	7007	6254.3
D03	0.96276	4262	4426.85	1.03977	5027	4834.73	1.09023	5949	5456.65	1.11786	6934	6202.93
D04	0.961832	4085	4247.1	1.03349	4894	4735.42	1.08289	5749	5308.94	1.10855	6564	5921.25

## Sheet: Plate
Plate	Repeat	End time	Start temp.	End temp.	BarCode
1	1	4:58:39 PM	24.8	25.1	N/A
Absorbance @ 600 (1.0s) - MDM (A)
0.000
1.03173	1.02693	1.02919	1.02057	1.06143	1.05148	1.04771	1.0478	1.18584	1.18267	1.1668	1.16898
1.09446	1.08019	1.07754	1.06599	1.0847	1.07166	1.06985	1.08892	1.16059	1.16338	1.16498	1.16138
0.96318	0.958534	0.96063	0.942965	1.21005	1.18997	1.20745	1.21175	0.839984	0.841804	0.836112	0.843151
0.971892	0.968302	0.96276	0.961832	0.0396691	0.0397727	0.0397246	0.0398798	0.0403586	0.0399285	0.0398813	0.0397304
0.891814	0.912021	1.07219	0.952971	0.950737	1.0075	0.744113	1.11721	0.693455	0.723375	0.0397017	0.0397124
0.0397358	0.0397309	0.0399587	0.0398774	0.0407203	0.0395577	0.0399353	0.0398258	0.0399606	0.040004	0.039765	0.0405463
0.0398925	0.0399606	0.0404215	0.0398691	0.0396584	0.039565	0.0397669	0.0397056	0.0397615	0.0398195	0.0402675	0.0395188
0.0400264	0.0405116	0.0413768	0.0396029	0.0392557	0.0395577	0.0396535	0.0398754	0.039581	0.0400921	0.0391002	0.0396117
Fluorescein (1.0s) - MDM (Counts)
125
1738	1722	1695	1798	4923	5070	4889	4917	20495	20763	21163	21069
4819	4991	4930	4902	9268	9535	9637	9540	9945	10017	9990	9997
6638	6617	6633	6634	6065	6257	6016	5724	3223	3319	3244	3303
4195	4191	4262	4085	1288	1245	1232	1239	1290	1202	1247	1208
1666	4427	15402	4015	7321	7521	6345	5261	2772	3756	1236	1237
1267	1170	1315	1256	1344	1143	1227	1235	1193	1248	1161	1269
1344	1343	1252	1299	1326	1341	1225	1233	1267	1193	1263	1263
1295	1261	1379	1371	1237	1323	1303	1251	1219	1244	1154	1219
Absorbance @ 600 (1.0s) - MDM (A)
0.000
1.09453	1.12671	1.11507	1.10521	1.12631	1.13707	1.12429	1.12486	1.23902	1.23972	1.2304	1.23862
1.16037	1.15846	1.15987	1.15106	1.16095	1.15148	1.14397	1.15721	1.21448	1.21672	1.22027	1.22109
1.0239	1.03271	1.03563	1.01976	1.26196	1.24972	1.26098	1.26328	0.889477	0.888325	0.88804	0.911891
1.04227	1.0421	1.03977	1.03349	0.039662	0.0397695	0.0397272	0.0398965	0.0403689	0.0399569	0.0398805	0.0397661
0.973258	1.00193	1.14297	1.03353	1.03097	1.08541	0.823947	1.18012	0.74641	0.786028	0.0397646	0.0397671
0.0398425	0.0398133	0.040027	0.0399564	0.040795	0.0396138	0.0399963	0.0398834	0.0400114	0.040083	0.0398513	0.0406243
0.0400207	0.0400971	0.040537	0.039951	0.0397564	0.0396727	0.0398649	0.0398011	0.039878	0.0399345	0.0403548	0.0396104
0.040174	0.040734	0.0414901	0.0397423	0.039395	0.0397082	0.0397666	0.0400289	0.0397126	0.0402023	0.0392521	0.0397646
Fluorescein (1.0s) - MDM (Counts)
142
2134	2134	2078	2132	6340	6509	6334	6374	24649	25905	26462	26204
6281	6646	6301	6206	12258	12361	12078	11653	12192	12285	12032	12386
8157	8272	8416	8227	7559	7772	7378	7267	3992	3959	4025	4112
5113	5186	5027	4894	1238	1256	1273	1250	1260	1197	1227	1254
2039	6037	19393	4891	9506	9495	8591	6637	3458	4973	1238	1211
1302	1164	1295	1224	1328	1142	1224	1220	1158	1206	1140	1226
1333	1259	1344	1288	1269	1266	1295	1259	1226	1278	1292	1258
1306	1227	1330	1306	1215	1330	1366	1241	1277	1328	1190	1272
Absorbance @ 600 (1.0s) - MDM (A)
0.000
1.14411	1.17778	1.15261	1.14735	1.16309	1.18666	1.17171	1.16952	1.26439	1.2673	1.26417	1.27218
1.19442	1.18518	1.19734	1.1921	1.19803	1.19119	1.18575	1.19715	1.24582	1.24763	1.25284	1.25034
1.07551	1.08352	1.08528	1.06846	1.27818	1.27385	1.27714	1.28161	0.957165	0.950265	0.966677	0.967666
1.09046	1.09323	1.09023	1.08289	0.039557	0.0396914	0.0396232	0.0397938	0.040276	0.0398108	0.0397684	0.0396442
1.03489	1.07869	1.18285	1.08914	1.08616	1.13063	0.883296	1.21795	0.796951	0.846125	0.0396495	0.0396515
0.0396987	0.0396783	0.0399093	0.0398644	0.0406622	0.039536	0.0398659	0.0397723	0.0398927	0.0399415	0.0397362	0.0405381
0.0398937	0.0399385	0.0403775	0.0398649	0.0396149	0.0395326	0.0397319	0.0396651	0.0397596	0.0397962	0.0402443	0.0394854
0.0400321	0.0404932	0.0414658	0.0396203	0.0392862	0.0395672	0.0396271	0.0399059	0.039557	0.0401707	0.0391246	0.0396042
Fluorescein (1.0s) - MDM (Counts)
131
2496	2490	2462	2408	7106	7729	7409	7366	28764	29979	30056	30259
7110	7703	7245	7282	14206	13981	13965	13418	13787	14074	14083	14113
9626	9788	9797	9784	8660	8946	8489	8323	4487	4527	4604	4721
5855	5982	5949	5749	1220	1215	1251	1273	1136	1178	1155	1233
2303	7234	23203	5845	11167	11245	10744	7672	4168	5866	1261	1273
1306	1140	1284	1221	1339	1140	1215	1238	1126	1185	1122	1260
1277	1284	1262	1250	1276	1316	1287	1227	1294	1216	1309	1246
1350	1204	1310	1318	1214	1330	1332	1169	1225	1180	1135	1296
Absorbance @ 600 (1.0s) - MDM (A)
0.000
1.17084	1.20078	1.17172	1.16803	1.18331	1.2086	1.19117	1.19181	1.28178	1.28625	1.27639	1.28562
1.21304	1.19733	1.21681	1.21089	1.21562	1.21092	1.20575	1.21446	1.26213	1.26555	1.2705	1.26835
1.0983	1.10891	1.11193	1.09673	1.28652	1.28531	1.28414	1.28797	0.985065	0.981494	1.00074	1.01027
1.11701	1.12035	1.11786	1.10855	0.0395338	0.0396463	0.0395893	0.0397588	0.0402325	0.0397866	0.0397374	0.0396137
1.07704	1.12663	1.20238	1.12114	1.1185	1.15956	0.950688	1.23843	0.869344	0.90091	0.0396205	0.0396078
0.0396862	0.039658	0.0398957	0.0398577	0.0406438	0.0394978	0.0398431	0.0397613	0.0398835	0.039924	0.0397164	0.0405042
0.0398757	0.0399371	0.0403764	0.0398494	0.0395923	0.039527	0.0397116	0.0396755	0.0397447	0.0397968	0.0402242	0.0394822
0.0400268	0.0405067	0.0414523	0.0396307	0.0392593	0.0395762	0.0396366	0.0399016	0.0395757	0.040157	0.0391265	0.0396025
Fluorescein (1.0s) - MDM (Counts)
148
2819	2874	2827	2756	8345	8554	8540	8315	33014	34400	34258	33853
8154	8802	8360	8115	16173	15905	16082	15585	16050	16365	16058	16353
10778	11396	11315	11280	10045	10268	9891	9728	5098	5029	5397	5552
6899	7007	6934	6564	1221	1243	1199	1267	1298	1260	1169	1222
2553	8293	25969	6733	12923	13305	13048	9147	5169	7233	1185	1253
1332	1169	1252	1294	1381	1136	1263	1265	1207	1238	1140	1249
1277	1307	1236	1278	1268	1293	1297	1261	1309	1199	1280	1300
1348	1261	1340	1312	1183	1309	1326	1230	1285	1297	1195	1191

## Sheet: Protocol
Protocol description
Protocol name ..................... Straight Thru GFP Expression - MDM
Protocol number ................... N/A
Name of the plate type ............ Generic 8x12 size plate
Number of repeats ................. 1
Delay between repeats ............. 0 s
Measurement height ................ Default
Protocol notes ....................
Name of the label ................. Absorbance @ 600 (1.0s) - MDM
Label technology .................. Photometry
CW-lamp filter name ............... 600
CW-lamp filter slot ............... A4
Measurement time .................. 1.0 s
Excitation Aperture ............... N/A
Name of the label ................. Fluorescein (1.0s) - MDM
Label technology .................. Prompt fluorometry
CW-lamp filter name ............... F485
CW-lamp filter slot ............... A5
Emission filter name .............. F535
Emission filter slot .............. A5
Measurement time .................. 1.0 s
Emission aperture ................. Damp
CW-lamp energy .................... 8264
Second measurement CW-lamp energy . 0
Emission side ..................... Above
CW-Lamp Control ................... Stabilized Energy
Excitation Aperture ............... N/A
Name of the label ................. Absorbance @ 600 (1.0s) - MDM
Label technology .................. Photometry
CW-lamp filter name ............... 600
CW-lamp filter slot ............... A4
Measurement time .................. 1.0 s
Excitation Aperture ............... N/A
Name of the label ................. Fluorescein (1.0s) - MDM
Label technology .................. Prompt fluorometry
CW-lamp filter name ............... F485
CW-lamp filter slot ............... A5
Emission filter name .............. F535
Emission filter slot .............. A5
Measurement time .................. 1.0 s
Emission aperture ................. Damp
CW-lamp energy .................... 8264
Second measurement CW-lamp energy . 0
Emission side ..................... Above
CW-Lamp Control ................... Stabilized Energy
Excitation Aperture ............... N/A
Name of the label ................. Absorbance @ 600 (1.0s) - MDM
Label technology .................. Photometry
CW-lamp filter name ............... 600
CW-lamp filter slot ............... A4
Measurement time .................. 1.0 s
Excitation Aperture ............... N/A
Name of the label ................. Fluorescein (1.0s) - MDM
Label technology .................. Prompt fluorometry
CW-lamp filter name ............... F485
CW-lamp filter slot ............... A5
Emission filter name .............. F535
Emission filter slot .............. A5
Measurement time .................. 1.0 s
Emission aperture ................. Damp
CW-lamp energy .................... 8264
Second measurement CW-lamp energy . 0
Emission side ..................... Above
CW-Lamp Control ................... Stabilized Energy
Excitation Aperture ............... N/A
Name of the label ................. Absorbance @ 600 (1.0s) - MDM
Label technology .................. Photometry
CW-lamp filter name ............... 600
CW-lamp filter slot ............... A4
Measurement time .................. 1.0 s
Excitation Aperture ............... N/A
Name of the label ................. Fluorescein (1.0s) - MDM
Label technology .................. Prompt fluorometry
CW-lamp filter name ............... F485
CW-lamp filter slot ............... A5
Emission filter name .............. F535
Emission filter slot .............. A5
Measurement time .................. 1.0 s
Emission aperture ................. Damp
CW-lamp energy .................... 8264
Second measurement CW-lamp energy . 0
Emission side ..................... Above
CW-Lamp Control ................... Stabilized Energy
Excitation Aperture ............... N/A
Plate map of plate 1
A | M M M M M M M M M M M M
B | M M M M M M M M M M M M
C | M M M M M M M M M M M M
D | M M M M M M M M M M M M
E | M M M M M M M M M M M M
F | M M M M M M M M M M M M
G | M M M M M M M M M M M M
H | M M M M M M M M M M M M

## Sheet: Notes
Notes for the assay run
The plate map of the assay protocol was replaced by a temporary plate map when starting the assay.
