# Supplementary material for: Release of transcriptional repression through the HCR promoter region confers uniform expression of HWP1 on surfaces of Candida albicans germ tubes
Source: PLoS One. 2018 Feb 13;13(2):e0192260. doi: 10.1371/journal.pone.0192260 (PMC5810986; doi:10.1371/journal.pone.0192260)
Supplement: S4 Appendix — (XLSX) [file pone.0192260.s007.xlsx]

## Sheet: Disk 1 11182012.csv
Document Name: Disk 1 11182012
Plate Type: Standard Curve
User: 7500 User
Document Information
Operator: 7500 User
Run Date: Sunday	November 18	2012 18:37:13
Last Modified: Sunday	November 18	2012 20:26:00
Instrument Type: Applied Biosystems 7500 Fast Real-Time PCR System
Exporting Mode: Based on Selected Wells and Report Setting
Comments:
SDS v1.4
Thermal Cycler Profile
Stage	Repetitions	Temperature	Time	Ramp Rate	Auto Increment
1	1	95.0 °C	00:30:00	Auto
2	40	94.0 °C	00:15:00	Auto
		55.0 °C	00:30:00	Auto
		72.0 °C	00:30:00	Auto
3 (Dissociation)	1	95.0 °C	00:15:00	Auto																														Figure 6D						1	HCRcTerY1 vs HCRcTerY2
		60.0 °C	01:00:00	Auto
		95.0 °C	00:15:00	Auto																																					0.230851
		60.0 °C	00:15:00	Auto
Fast 7500 Mode																															YNB
Data Collection : Stage 2 Step 2																	PMA1	y = -2.7475x + 14.15						PMA1	GFP70	GFP70/PMA1	Average	SD			Avr.	SD								2	HCRcTerYC3 vs HCRcTerYC10
PCR Volume: 20 µL																		Log10(x)	x	Avergae	SD			0.98635	0.0776681	0.078743	0.0829939	0.0062624		HCRc	0.0829939	0.0062624
						PMA1											14.1664	-0.00596906	0.98635	0.932727	0.0616778		YNB SKD233	0.865325	0.0780397	0.0901854				HCRd	0.259516	0.0127234									0.455781
Well	Sample Name	Detector	Task	Ct	1	14.1664	14.2349	0	14.2349							YNB SKD233	14.3226	-0.0628207	0.865325					0.946507	0.0757709	0.0800532				HCRcTerY1	0.177055	0.00300987
A1		PMA1	Unknown	14.1664		14.3226		-1	16.7542								14.2156	-0.0238763	0.946507											HCRcTerY2	0.149954	0.0331115
A2		GFP70	Unknown	18.4878		14.2156		-2	19.6785															0.481406	0.955328	1.98445	1.77468	0.181813		HCRcTerYC3	0.0771568	0.0137666								3	1 versus 2		0.177856	0.0776521
A3		PMA1	Unknown	16.7801	0.1	16.7801	16.7542	-3	22.4184								GFP70	y = -3.1843x + 14.954					M199 SKD233	0.570159	0.956088	1.67688				HCRcTerYC10	0.0862774	0.0133125											0.179583	0.0906691
A4		GFP70	Unknown	18.0434		16.6136												Log10(x)	x	Avergae	SD			0.658234	1.09444	1.66269				HCRdTerH5	0.0947563	0.0103691									4.01273e-05		0.173725	0.0631493
A5		PMA1	Unknown	19.6576		16.869											18.4878	-1.10976	0.0776681	0.0771596	0.00121687									HCRdTerH6	0.128778	0.0351829											0.133254	0.0720753
A6		GFP70	Unknown	21.6183	0.01	19.6576	19.6785									YNB SKD233	18.4812	-1.10768	0.0780397					0.828491	0.147352	0.177856	0.177055	0.00300987		HCRdTerHC2	0.208138	0.0165577											0.128517	0.0882843
A7		PMA1	Unknown	22.169		19.634											18.522	-1.1205	0.0757709				YNB HCRcTerN1	0.872353	0.156659	0.179583				HCRdTerHC5	0.195158	0.0219075											0.18809	0.0984725
A8		GFP70	Unknown	24.3895		19.744																		0.928296	0.161268	0.173725														4	1 versus HCRc
A9		PMA1	Unknown	14.3843	0.001	22.169	22.4184										PMA1	y = -2.7475x + 14.15																							0.00129064
A10		GFP70	Unknown	15.3966		22.8789												Log10(x)	x	Avergae	SD			0.468078	0.726115	1.55127	1.50433	0.11613
A11		PMA1	Unknown	14.5634		22.2073											15.0223	-0.317489	0.481406	0.569933	0.0884143		M199 HCRcTerN1	0.485173	0.771252	1.58965				HCRc	0.0829939	0.0062624
A12		GFP70	Unknown	14.9729												M199 SKD233	14.8204	-0.244004	0.570159					0.51453	0.705975	1.37208				HCRd	0.259516	0.0127234									5	2 versus HCRc
B1		PMA1	Unknown	14.3226													14.649	-0.18162	0.658234											HCRdTerH5	0.0947563	0.0103691										0.880368
B2		GFP70	Unknown	18.4812		GFP70		0	14.9542															0.70719	0.0942361	0.133254	0.149954	0.0331115		HCRdTerH6	0.128778	0.0351829
B3		PMA1	Unknown	16.6136	1	15.0172	14.9542	-1	18.0162								GFP70	y = -3.1843x + 14.954					YNB HCRcTerN2	0.769656	0.0989141	0.128517				HCRdTerHC2	0.208138	0.0165577
B4		GFP70	Unknown	18.0266		15.0161		-2	21.567									Log10(x)	x	Avergae	SD			0.848521	0.159598	0.18809				HCRdTerHC5	0.195158	0.0219075									6	1 versus HCRd
B5		PMA1	Unknown	19.634		14.8292		-3	24.385								15.0172	-0.0198474	0.955328	1.00195	0.0800981																					0.000565863
B6		GFP70	Unknown	21.6473	0.1	18.0434	18.0162									M199 SKD233	15.0161	-0.0195019	0.956088					0.640977	0.726115	1.13283	1.16659	0.0788833
B7		PMA1	Unknown	22.8789		18.0266											14.8292	0.0391923	1.09444				M199 HCRcTerN2	0.613695	0.771252	1.25674															7	2 versus HCRd
B8		GFP70	Unknown	24.7498		17.9785																		0.635894	0.705975	1.11021																2.4547e-07
B9		PMA1	Unknown	14.3228	0.01	21.6183	21.567										PMA1	y = -2.7475x + 14.15
B10		GFP70	Unknown	15.3132		21.6473												Log10(x)	x	Avergae	SD			0.479795	0.0372571	0.0776521	0.0771568	0.0137666
B11		PMA1	Unknown	14.4624		21.4355											14.3843	-0.0817122	0.828491	0.87638	0.0500245		YNB HCRcTerC3	0.513496	0.0465582	0.0906691
B12		GFP70	Unknown	14.9295	0.001	24.3895	24.385									YNB HCRcTerN1	14.3228	-0.0593078	0.872353					0.638136	0.0402979	0.0631493
C1		PMA1	Unknown	14.2156		24.7498											14.2487	-0.0323133	0.928296
C2		GFP70	Unknown	18.522		24.0158																		0.279352	0.898443	3.21617	2.31845	0.780627
C3		PMA1	Unknown	16.869		PMA1	y = -2.7475x + 14.15										GFP70	y = -3.1843x + 14.954					M199 HCRcTerN2	0.421701	0.818071	1.93993
C4		GFP70	Unknown	17.9785			Log10(x)	x	Avergae	SD								Log10(x)	x	Avergae	SD			0.438275	0.788565	1.79925
C5		PMA1	Unknown	19.744		14.5634	-0.150464	0.70719	0.775122	0.0708238							17.6022	-0.831643	0.147352	0.155093	0.00708897
C6		GFP70	Unknown	21.4355	YNB HCRcTerN2	14.4624	-0.113703	0.769656								YNB HCRcTerN1	17.5175	-0.805043	0.156659					0.727508	0.0524354	0.0720753	0.0862774	0.0133125
C7		PMA1	Unknown	22.2073		14.346	-0.0713376	0.848521									17.4774	-0.79245	0.161268				YNB HCRcTerC10	0.74173	0.0654831	0.0882843
C8		GFP70	Unknown	24.0158																				0.779262	0.0767358	0.0984725
C9		PMA1	Unknown	14.2487		GFP70	y = -3.1843x + 14.954										PMA1	y = -2.7475x + 14.15
C10		GFP70	Unknown	15.4355			Log10(x)	x	Avergae	SD								Log10(x)	x	Avergae	SD			0.167348	0.223629	1.33631	1.56739	0.394324
C11		PMA1	Unknown	14.346		18.2204	-1.02578	0.0942361	0.117583	0.0364614							15.0558	-0.329682	0.468078	0.48926	0.0234939		M199 HCRcTerC10	0.106881	0.216187	2.0227
C12		GFP70	Unknown	14.9366	YNB HCRcTerN2	18.1534	-1.00474	0.0989141								M199 HCRcTerN1	15.013	-0.314104	0.485173					0.167012	0.224325	1.34317
D1		PMA1	Unknown	15.0263		17.4918	-0.796973	0.159598									14.9429	-0.28859	0.51453
D2		GFP70	Unknown	15.1021																				0.764449	0.188858	0.247052	0.259516	0.0127234
D3		PMA1	Unknown	14.5296		PMA1	y = -2.7475x + 14.15										GFP70	y = -3.1843x + 14.954					YNB SKD232	0.723738	0.187457	0.259012
D4		GFP70	Unknown	17.0253			Log10(x)	x	Avergae	SD								Log10(x)	x	Avergae	SD			0.819105	0.223192	0.272483
D5		PMA1	Unknown	14.4705		14.6807	-0.193157	0.640977	0.630189	0.0145083							15.3966	-0.138994	0.726115	0.734448	0.0334269
D6		GFP70	Unknown	15.4706	M199 HCRcTerN2	14.7326	-0.212047	0.613695								M199 HCRcTerN1	15.3132	-0.112803	0.771252					0.355222	0.688282	1.93761	1.67755	0.243687
D7		PMA1	Unknown	15.4567		14.6902	-0.196615	0.635894									15.4355	-0.151211	0.705975				M199 SKD232	0.341646	0.560504	1.6406
D8		GFP70	Unknown	16.7925																				0.452116	0.657583	1.45446
D9		PMA1	Unknown	14.5801		GFP70	y = -3.1843x + 14.954										PMA1	y = -2.7475x + 14.15
D10		GFP70	Unknown	16.5624			Log10(x)	x	Avergae	SD								Log10(x)	x	Avergae	SD			0.334506	0.0316651	0.0946623	0.0947563	0.0103691
D11		PMA1	Unknown	14.4105		14.9729	-0.00593537	0.986426	1.00565	0.0168543							15.0263	-0.318944	0.479795	0.543809	0.0834098		YNB HCRdTerNH5	0.389559	0.0409707	0.105172
D12		GFP70	Unknown	15.2855	M199 HCRcTerN2	14.9295	0.007694	1.01787								YNB HCRcTerC3	14.9453	-0.289463	0.513496					0.482577	0.0407462	0.0844345
E1		PMA1	Unknown	14.9453		14.9366	0.00546431	1.01266									14.686	-0.195086	0.638136
E2		GFP70	Unknown	15.2317																				0.406162	0.264628	0.651534	0.587374	0.0746071
E3		PMA1	Unknown	14.5065		PMA1	y = -2.7475x + 14.15										GFP70	y = -3.1843x + 14.954					M199 HCRdTerNH5	0.441076	0.222967	0.505506
E4		GFP70	Unknown	17.0721			Log10(x)	x	Avergae	SD								Log10(x)	x	Avergae	SD			0.420959	0.254715	0.605082
E5		PMA1	Unknown	14.5358		14.5296	-0.138162	0.727508	0.7495	0.0267373							19.5037	-1.42879	0.0372571	0.041371	0.00474252
E6		GFP70	Unknown	15.7546	YNB HCRcTerC10	14.5065	-0.129754	0.74173								YNB HCRcTerC3	19.1955	-1.332	0.0465582					0.697361	0.0724175	0.103845	0.128778	0.0351829
E7		PMA1	Unknown	15.2749		14.4476	-0.108317	0.779262									19.3952	-1.39472	0.0402979				YNB HCRdTerNH6	0.581305	0.0659583	0.113466
E8		GFP70	Unknown	17.0294																				0.43128	0.0728956	0.169022
E9		PMA1	Unknown	14.7973		GFP70	y = -3.1843x + 14.954										PMA1	y = -2.7475x + 14.15
E10		GFP70	Unknown	16.4906			Log10(x)	x	Avergae	SD								Log10(x)	x	Avergae	SD			0.452003	0.312534	0.691442	0.708173	0.0382912
E11		PMA1	Unknown	14.3385		19.0311	-1.28038	0.0524354	0.0648848	0.0121613							15.6717	-0.553849	0.279352	0.379776	0.087364		M199 HCRdTerNH6	0.437761	0.329189	0.751982
E12		GFP70	Unknown	15.1945	YNB HCRcTerC10	18.7238	-1.18387	0.0654831								M199 HCRcTerC3	15.1803	-0.374995	0.421701					0.465184	0.316834	0.681094
F1		PMA1	Unknown	14.686		18.5045	-1.115	0.0767358									15.1343	-0.358253	0.438275
F2		GFP70	Unknown	15.2825																				0.803871	0.178824	0.222454	0.208138	0.0165577
F3		PMA1	Unknown	14.4476		PMA1	y = -2.7475x + 14.15										GFP70	y = -3.1843x + 14.954					YNB HCRdTerCH2	0.853871	0.180984	0.211957
F4		GFP70	Unknown	17.021			Log10(x)	x	Avergae	SD								Log10(x)	x	Avergae	SD			0.829884	0.157682	0.190005
F5		PMA1	Unknown	14.3881		16.2831	-0.776379	0.167348	0.14708	0.0348144							15.1021	-0.0465094	0.898443	0.835026	0.0568674
F6		GFP70	Unknown	15.5337	M199 HCRcTerC10	16.8181	-0.971101	0.106881								M199 HCRcTerC3	15.2317	-0.0872091	0.818071					0.387573	0.786856	2.03022	2.38874	0.31068
F7		PMA1	Unknown	15.0194		16.2855	-0.777252	0.167012									15.2825	-0.103162	0.788565				M199 HCRdTerCH2	0.328643	0.840375	2.55711
F8		GFP70	Unknown	16.8453																				0.322072	0.830588	2.57889
F9		PMA1	Unknown	15.1535		GFP70	y = -3.1843x + 14.954										PMA1	y = -2.7475x + 14.15
F10		GFP70	Unknown	16.5435			Log10(x)	x	Avergae	SD								Log10(x)	x	Avergae	SD			1.0069	0.215734	0.214257	0.195158	0.0219075
F11		PMA1	Unknown	14.3725		17.0253	-0.650473	0.223629	0.22138	0.00451072							14.4705	-0.116652	0.764449	0.769097	0.0478529		YNB HCRdTerCH5	0.829397	0.165857	0.199973
F12		GFP70	Unknown	15.2107	M199 HCRcTerC10	17.0721	-0.66517	0.216187								YNB SKD232	14.5358	-0.140419	0.723738					0.847029	0.145048	0.171243
G1		PMA1	Unknown	14.1418		17.021	-0.649122	0.224325									14.3881	-0.0866606	0.819105
G2		PMA1	Unknown	14.3732																				0.438202	0.697552	1.59185	1.58272	0.177496
G3		PMA1	Unknown	14.3481		PMA1	y = -2.7475x + 14.15										GFP70	y = -3.1843x + 14.954					M199 HCRdTerCH5	0.451548	0.792681	1.75547
G4		GFP70	Unknown	15.0172			Log10(x)	x	Avergae	SD								Log10(x)	x	Avergae	SD			0.549334	0.769526	1.40083
G5		GFP70	Unknown	15.0161		15.4567	-0.475596	0.334506	0.402214	0.0748424							17.259	-0.723864	0.188858	0.199836	0.0202395
G6		GFP70	Unknown	14.8292	YNB HCRdTerNH5	15.2749	-0.409427	0.389559								YNB SKD232	17.2693	-0.727099	0.187457
G7		PMA1	Unknown	15.1345		15.0194	-0.316433	0.482577									17.028	-0.651321	0.223192
G8		PMA1	Unknown	15.0987
G9		PMA1	Unknown	14.8648		GFP70	y = -3.1843x + 14.954										PMA1	y = -2.7475x + 14.15
G10		GFP70	Unknown	17.6022			Log10(x)	x	Avergae	SD								Log10(x)	x	Avergae	SD
G11		GFP70	Unknown	17.5175		19.7286	-1.49942	0.0316651	0.037794	0.00530897							15.385	-0.4495	0.355222	0.382995	0.0602447
G12		GFP70	Unknown	17.4774	YNB HCRdTerNH5	19.3723	-1.38753	0.0409707								M199 SKD232	15.4315	-0.466424	0.341646
H1		GFP70	Unknown	17.075		19.3799	-1.38991	0.0407462									15.0972	-0.34475	0.452116
H2		GFP70	Unknown	17.4386
H3		GFP70	Unknown	17.624		PMA1	y = -2.7475x + 14.15										GFP70	y = -3.1843x + 14.954
H4		PMA1	Unknown	15.0223			Log10(x)	x	Avergae	SD								Log10(x)	x	Avergae	SD
H5		PMA1	Unknown	14.8204		15.2251	-0.391301	0.406162	0.422732	0.0175245							15.4706	-0.162233	0.688282	0.635457	0.0667007
H6		PMA1	Unknown	14.649	M199 HCRdTerNH5	15.1267	-0.355487	0.441076								M199 SKD232	15.7546	-0.251421	0.560504
H7		GFP70	Unknown	15.4521		15.1824	-0.37576	0.420959									15.5337	-0.182049	0.657583
H8		GFP70	Unknown	15.2753
H9		GFP70	Unknown	15.3163		GFP70	y = -3.1843x + 14.954										PMA1	y = -2.7475x + 14.15
H10		PMA1	Unknown	15.0558			Log10(x)	x	Avergae	SD								Log10(x)	x	Avergae	SD
H11		PMA1	Unknown	15.013		16.7925	-0.577364	0.264628	0.247437	0.0217636							14.4105	-0.0948135	0.803871
H12		PMA1	Unknown	14.9429	M199 HCRdTerNH5	17.0294	-0.65176	0.222967								YNB HCRdTerCH2	14.3385	-0.0686078	0.853871
						16.8453	-0.593945	0.254715									14.3725	-0.0809827	0.829884
						PMA1	y = -2.7475x + 14.15										GFP70	y = -3.1843x + 14.954
							Log10(x)	x	Avergae	SD								Log10(x)	x	Avergae	SD
						14.5801	-0.156542	0.697361									17.3345	-0.747574	0.178824
					YNB HCRdTerNH6	14.7973	-0.235596	0.581305								YNB HCRdTerCH2	17.3179	-0.742361	0.180984
						15.1535	-0.365241	0.43128									17.5085	-0.802217	0.157682
						GFP70	y = -3.1843x + 14.954										PMA1	y = -2.7475x + 14.15
							Log10(x)	x	Avergae	SD								Log10(x)	x	Avergae	SD
						18.5846	-1.14016	0.0724175									15.281	-0.411647	0.387573
					YNB HCRdTerNH6	18.7138	-1.18073	0.0659583								M199 HCRdTerCH2	15.4778	-0.483276	0.328643
						18.5755	-1.1373	0.0728956									15.5019	-0.492047	0.322072
						PMA1	y = -2.7475x + 14.15										GFP70	y = -3.1843x + 14.954
							Log10(x)	x	Avergae	SD								Log10(x)	x	Avergae	SD
						15.0975	-0.344859	0.452003									15.2855	-0.104105	0.786856
					M199 HCRdTerNH6	15.1357	-0.358763	0.437761								M199 HCRdTerCH2	15.1945	-0.0755268	0.840375
						15.0632	-0.332375	0.465184									15.2107	-0.0806143	0.830588
						GFP70	y = -3.1843x + 14.954										PMA1	y = -2.7475x + 14.15
							Log10(x)	x	Avergae	SD								Log10(x)	x	Avergae	SD
						16.5624	-0.505103	0.312534									14.1418	0.00298453	1.0069
					M199 HCRdTerNH6	16.4906	-0.482555	0.329189								YNB HCRdTerCH5	14.3732	-0.0812375	0.829397
						16.5435	-0.499168	0.316834									14.3481	-0.0721019	0.847029
																	GFP70	y = -3.1843x + 14.954
																		Log10(x)	x	Avergae	SD
																	17.075	-0.66608	0.215734
																YNB HCRdTerCH5	17.4386	-0.780266	0.165857
																	17.624	-0.838489	0.145048
																	PMA1	y = -2.7475x + 14.15
																		Log10(x)	x	Avergae	SD
																	15.1345	-0.358326	0.438202
																M199 HCRdTerCH5	15.0987	-0.345296	0.451548
																	14.8648	-0.260164	0.549334
																	GFP70	y = -3.1843x + 14.954
																		Log10(x)	x	Avergae	SD
																	15.4521	-0.156424	0.697552
																M199 HCRdTerCH5	15.2753	-0.100901	0.792681
																	15.3163	-0.113777	0.769526
