# Supplementary material for: Release of transcriptional repression through the HCR promoter region confers uniform expression of HWP1 on surfaces of Candida albicans germ tubes
Source: PLoS One. 2018 Feb 13;13(2):e0192260. doi: 10.1371/journal.pone.0192260 (PMC5810986; doi:10.1371/journal.pone.0192260)
Supplement: S5 Appendix — (XLSX) [file pone.0192260.s008.xlsx]

## Sheet: Data
PMA1
cDNA(500 ng)	Ct	LOG10(x)	x	Average	S.D.	%
	Y=-3.5246Log10(x) + 15.573														PMA1
YNB	15.4429	0.0368973	1.08867	1.19449	0.0981287	99.4452									1	15.4429	15.3044		1	15.3044	0
	15.2782	0.0836075	1.21229													15.2782			0.1	19.8833	-1
	15.192	0.108054	1.28249													15.192			0.01	22.6942	-2
Lee's Yeast	16.0706	-0.141123	0.722565	0.588187	0.148302	48.9687			E=10^-(1/-3.5246)						0.1	19.8479	19.8833		0.001	26.1161	-3
	16.8687	-0.36747	0.429072													19.9267
	16.3226	-0.212592	0.612926													19.8754
Lee's + FU yeast	15.8175	-0.069342	0.852429	1.00724	0.345416	83.8561		E	1.9183						0.01	22.6398	22.6942
	15.0545	0.14705	1.40298													22.6822
	15.9806	-0.115598	0.766305						%E=(E-1)*100							22.7606
M199	15.9222	-0.0990357	0.796094	1.20115	0.486459	100									0.001	25.7357	26.1161
	15.4742	0.0280204	1.06665					E(%)	91.8304							26.1943
	14.7242	0.240726	1.74071													26.4182
Lee's hyphae	15.0807	0.13962	1.37918	1.10071	0.350645	91.6379
	15.2735	0.0849404	1.21602
	16.1041	-0.150624	0.706929
ALS3
cDNA(500 ng)	Ct	LOG10(x)	x	Average	S.D.	%
	y=-3.461log(10)x + 22.459																		0	22.088
YNB	22.0189	0.12716	1.34017	1.28092	0.0615334	71.3385						1.34017							-1	26.5362
	22.0818	0.108986	1.28524																-2	29.2623
	22.1634	0.0854088	1.21733						E=10^-(1/-3.4614)						ALS3				-3	32.7172
Lee's Yeast	22.6707	-0.0611673	0.868626	1.12664	0.253168	62.7464									1	22.0189	22.088
	22.2665	0.0556198	1.13663					E	1.94491							22.0818
	21.9807	0.138197	1.37467													22.1634
Lee's + FU yeast	21.0109	0.418405	2.62063	1.79555	0.795205	100		E(%)	94.4914						0.1	26.4507	26.5362
	22.4087	0.0145334	1.03403													26.6027
	21.6334	0.238544	1.73198													26.5553
M199	25.0775	-0.756573	0.175157	0.244487	0.118211	13.6163									0.01	29.2016	29.2623
	25.059	-0.751228	0.177326													29.3229
	23.9095	-0.419099	0.380979
Lee's hyphae	25.0349	-0.744265	0.180192	0.132613	0.0445617	7.38566									0.001	32.858	32.7172
	26.0477	-1.0369	0.0918551													31.9525
	25.5751	-0.900347	0.125792													33.3411
ALS3 normalized to PMA1
ALS3	PMA1	ALS3/PMA1	Average	S.D.	%
																			0	31.2974
1.34017	1.08867	1.23101	1.08013	0.141965	53.1735			YNB											-1	33.3708
1.28524	1.21229	1.06018													H-1				-2	32.8003
1.21733	1.28249	0.949193													1	31.2054	31.2974		-3	32.7172
0.868626	0.722565	1.20214	2.03133	0.746273	100			Lee's Yeast								31.2747
1.13663	0.429072	2.64905														31.4121
1.37467	0.612926	2.24279													0.1	34.6845	33.3708
2.62063	0.852429	3.07431	2.02384	1.18643	99.6312			Lee's + FU yeast								33.0858
1.03403	1.40298	0.737026														32.3422
1.73198	0.766305	2.26018													0.01	33.3443	32.8003
0.175157	0.796094	0.22002	0.20171	0.0307183	9.92997			M199								32.2564
0.177326	1.06665	0.166246														33.4617
0.380979	1.74071	0.218865													0.001	32.2409	32.2129
0.180192	1.37918	0.130652	0.128044	0.0512518	6.30344			Lee's hyphae								32
0.0918551	1.21602	0.0755375														32.3977
0.125792	0.706929	0.177941

## Sheet: normalized
ALS3 normalized to PMA1
Media		%
YNB yeast		53.1735
Lee's Yeast		100											YNB yeast		53.1735				ALS3 normalized to PMA1
Lee's + FU yeast		99.6312											Lee's Yeast		100				ALS3	PMA1	ALS3/PMA1	Average	S.D.	%
M199 hyphae		9.92997											M199 hyphae		9.92997
Lee's hyphae		6.30344											Lee's hyphae		6.30344				1.34017	1.08867	1.23101	1.08013	0.141965	53.1735		YNB
																			1.28524	1.21229	1.06018
		Average	STDDEV																1.21733	1.28249	0.949193
YNB yeast		1.08013	0.141965																0.868626	0.722565	1.20214	2.03133	0.746273	100		Lee's Yeast
Lee's Yeast		2.03133	0.746273																1.13663	0.429072	2.64905
Lee's + FU yeast		2.02384	1.18643																1.37467	0.612926	2.24279
M199 hyphae		0.20171	0.0307183																2.62063	0.852429	3.07431	2.02384	1.18643	99.6312		Lee's + FU yeast
Lee's hyphae		0.128044	0.0512518																1.03403	1.40298	0.737026
																			1.73198	0.766305	2.26018
FOLD INCREASE ALS3 (YEAST/HYPHAE)																			0.175157	0.796094	0.22002	0.20171	0.0307183	9.92997		M199
																			0.177326	1.06665	0.166246
YNB/M199		5.35485																	0.380979	1.74071	0.218865
Lee'sY/Lee's H		15.8643																	0.180192	1.37918	0.130652	0.128044	0.0512518	6.30344		Lee's hyphae
Lee'sY+FU/Lee'sH		15.8058																	0.0918551	1.21602	0.0755375
																			0.125792	0.706929	0.177941
													statistics see data on worksheet 1; ALS3 normalized to PMA1 copied above
													YNB and Lee's yeast		vsM199 and Lee's hyphae
												T Test	0.000731714
